# Supplementary material for: Intergenerational Differences in Perceptions of Family Functioning, Parenting, and Cyberbullying Victimization in Arab Families
Source: Research Square preprint supplement (doi:10.21203/rs.3.rs-8402209/v1), 2025-12-22
Supplement: Supplementary file 1 [file fea14f3c38851bcc007640e9.docx]

| Table S1. Assumptions check values of regression analysis | | | |
| --- | --- | --- | --- |
| **Parents** | | **Adolescents** | |
| **Predictors:** FAD General Functioning,  APQ Positive Parenting  **Outcome**: Cyberbullying frequency | Durbin–Watson Statistic: 1.516  Collinearity Statistics - VIF: 1.183  Tolerance: 0.846  Standardized Residuals: –1.17 to 3.16 | Predictors: FAD General Functioning,  APQ Positive Parenting  Outcome: Cyberbullying frequency | Durbin–Watson Statistic: 1.354  Collinearity Statistics - VIF: 1.1978  Tolerance: 0.8349  Standardized Residuals: –3.34 to 3.34 |
| **Predictors:** FAD General Functioning,  APQ Positive Parenting  **Outcome:** Report to parent | Durbin–Watson Statistic: 1.265  Collinearity Statistics-VIF: 1.183  Tolerance: 0.846  Standardized Residuals: –3.25 to 2.27 | Predictors: FAD General Functioning,  APQ Positive Parenting  Outcome: Report to parent | Durbin–Watson Statistic: 1.773  Collinearity Statistics-VIF: 1.157  Tolerance: 0.864  Standardized Residuals: –2.41 to 2.04 |

| Table S2. Assumptions check values of LMM analysis | |
| --- | --- |
| **Parents** | **Adolescents** |
| **Q-Q Plot**  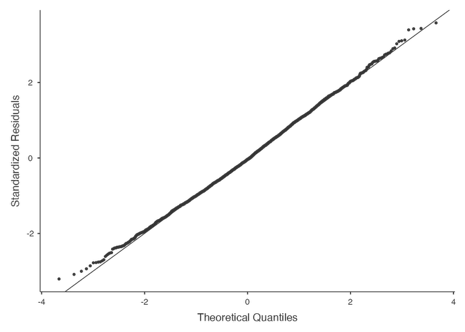 | **Q-Q Plot**  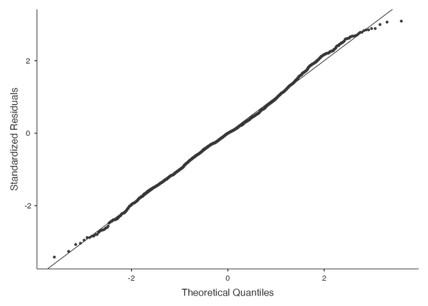 |
| **Residual histogram**  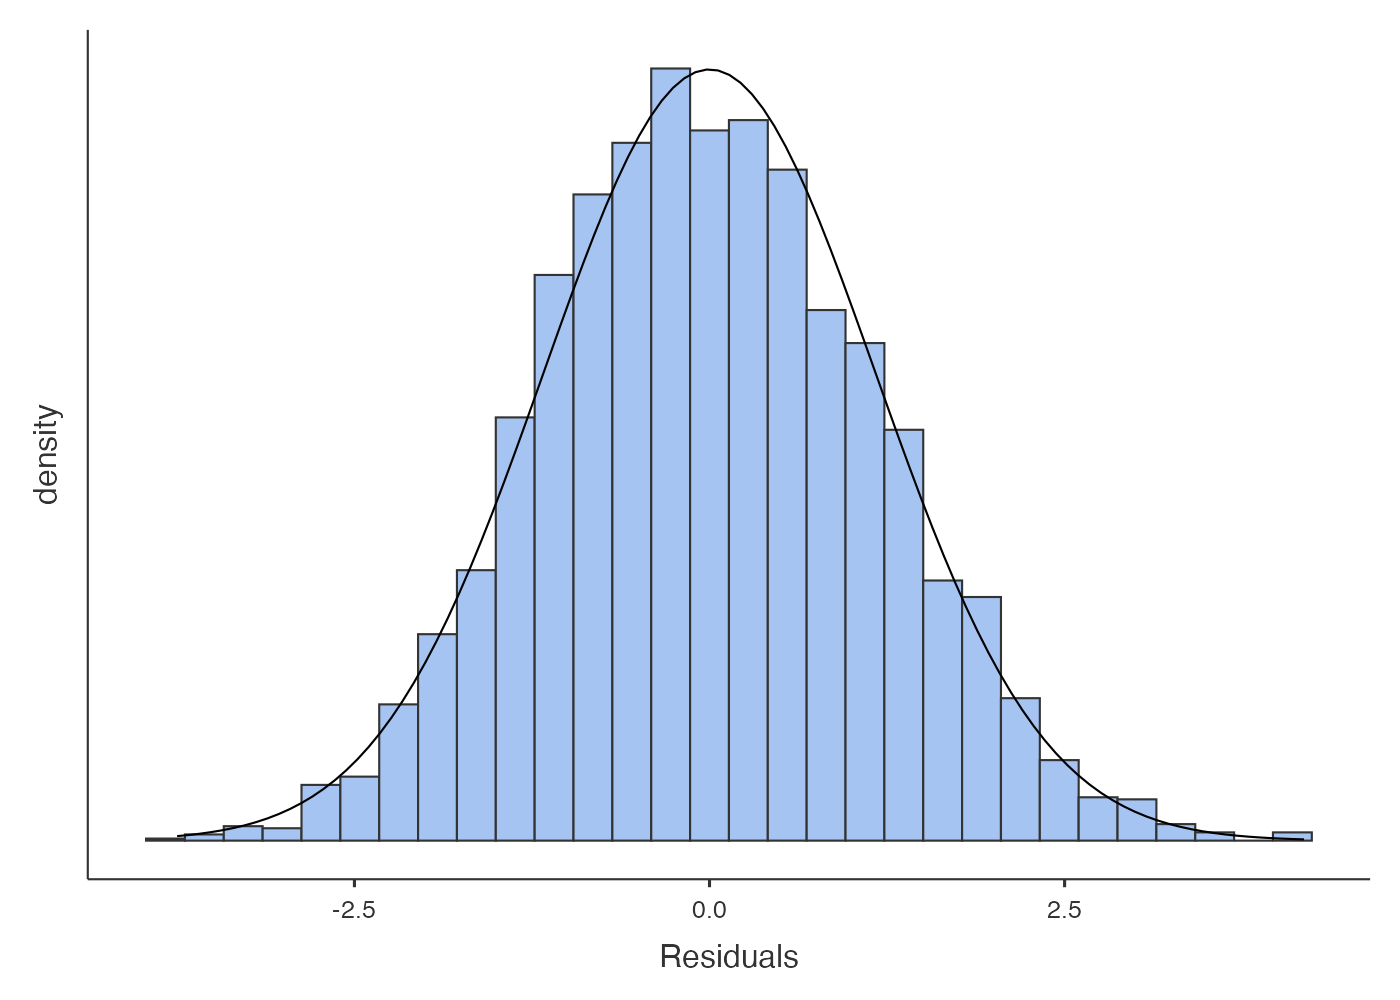 | **Residual histogram**  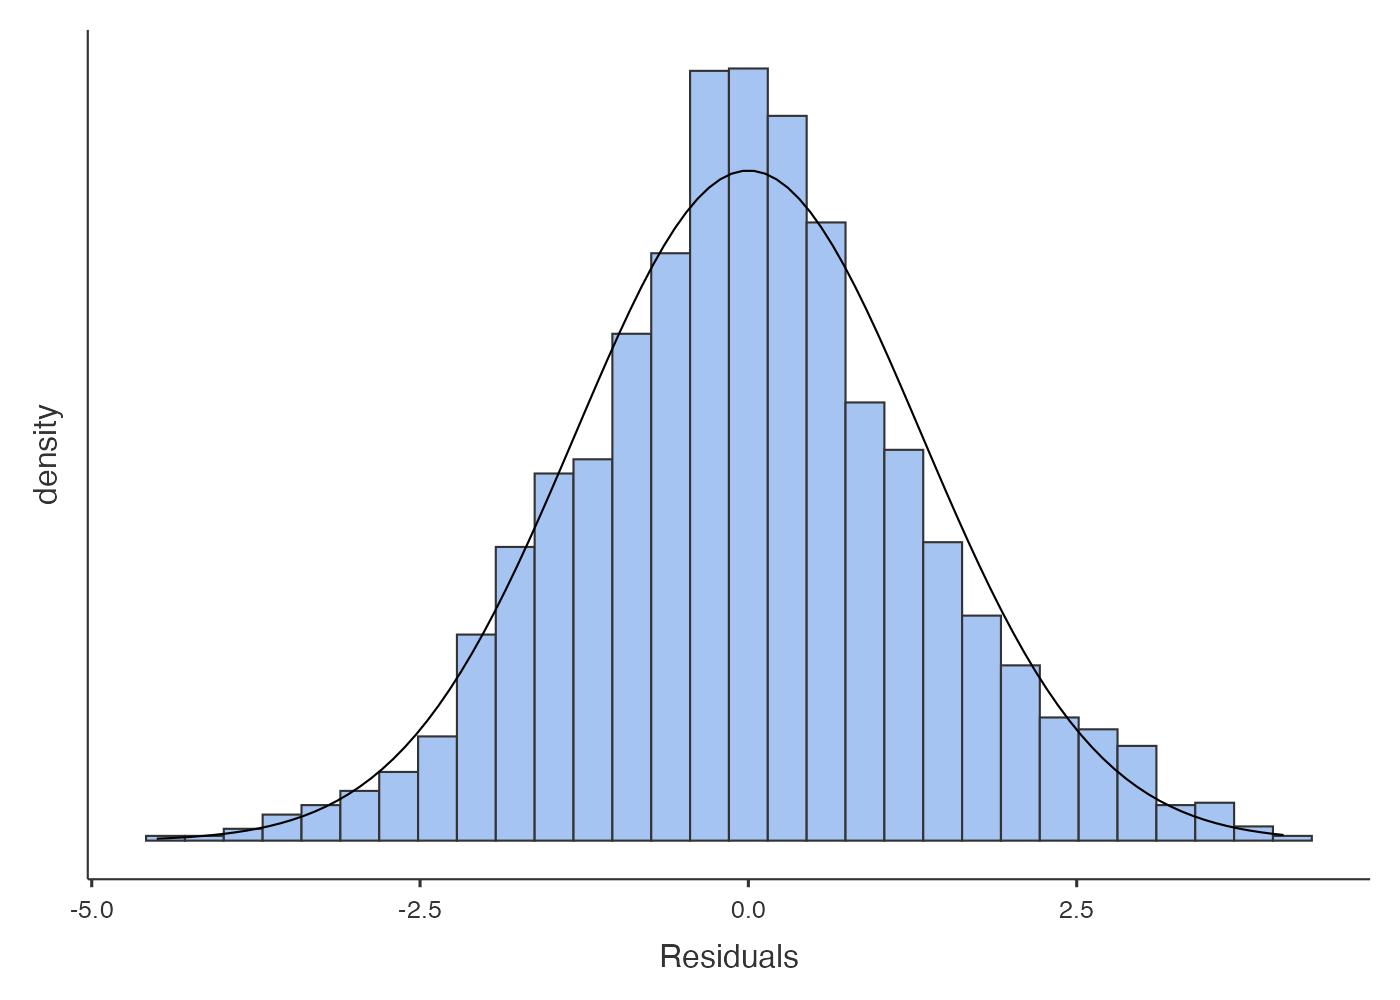 |

| **Residual-Predicted Scatterplot**  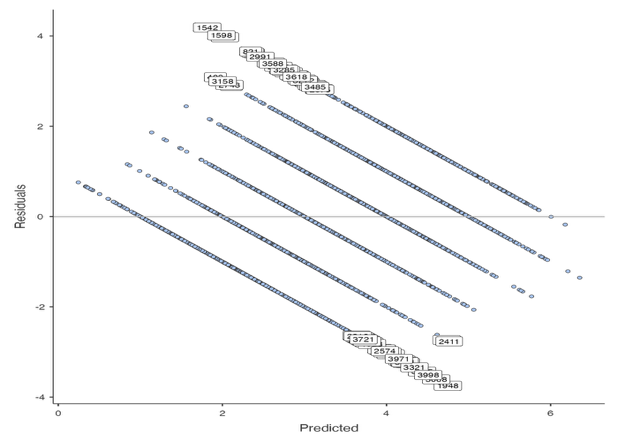 | **Residual-Predicted Scatterplot**  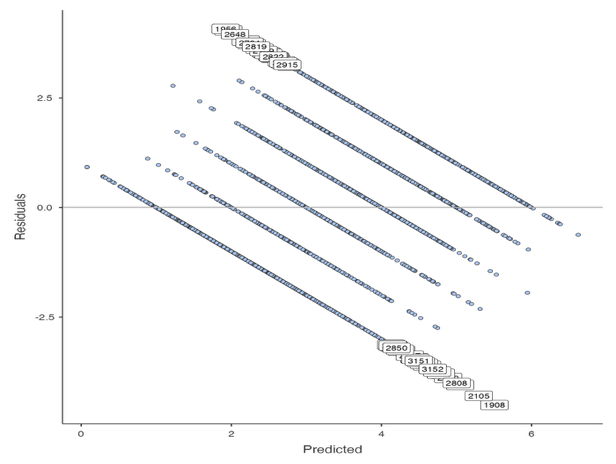 |
| --- | --- |
| **Random coefficients histogram**  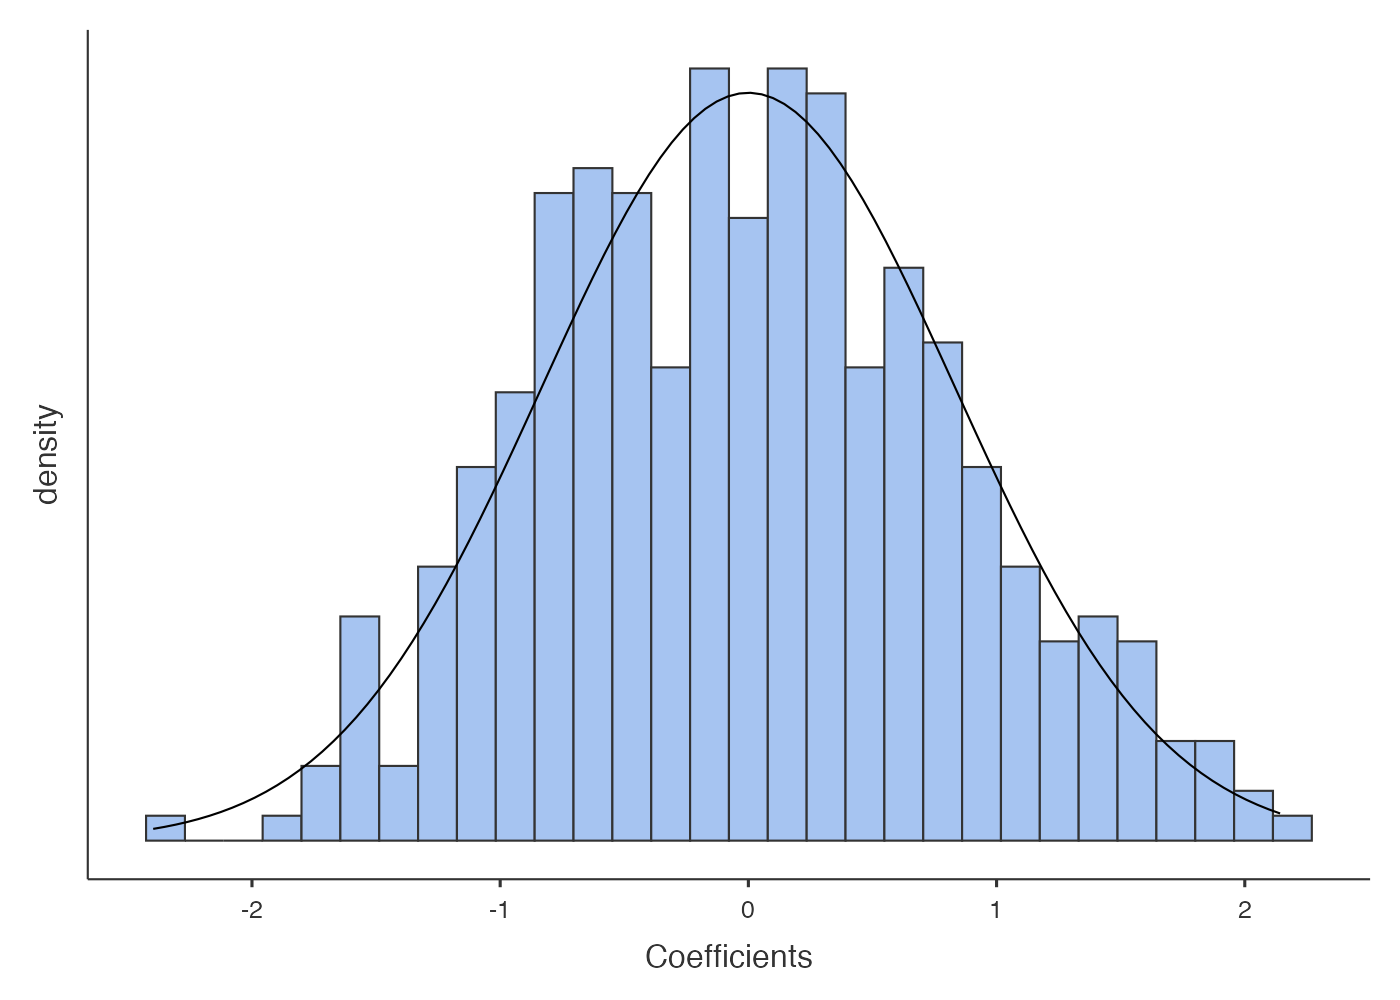 | **Random coefficients histogram**  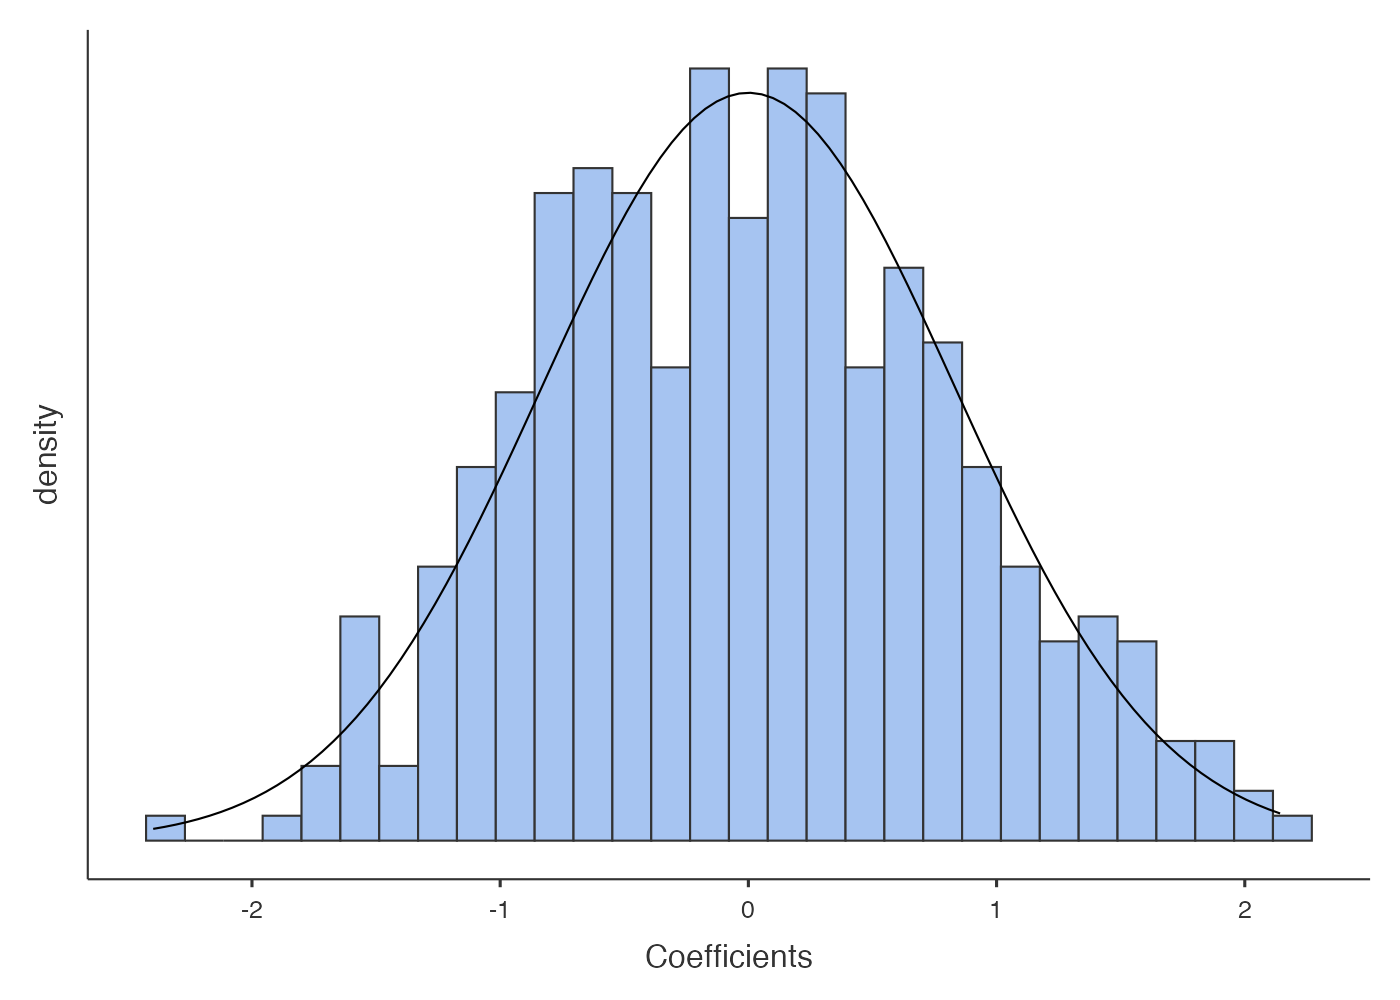 |
